# Supplementary material for: Saliva proteomics updates in biomedicine
Source: J Biol Res (Thessalon). 2019 Dec 12;26:17. doi: 10.1186/s40709-019-0109-7 (PMC6909541; doi:10.1186/s40709-019-0109-7)
Supplement: Supplementary file 1 — Additional file 1. Additional table. [file 40709_2019_109_MOESM1_ESM.xlsx]

## Sheet: Sheet1
UNIPROT ENTRY	PROTEIN NAMES	GENE NAMES
P22894 (MMP8_HUMAN)	MMP-8, Neutrophil collagenase, Matrix metalloproteinase-8	CLG1, HNC, MMP-8, PMNL-CL
P02749 (APOH_HUMAN)	Apolipoprotein H	APOH, B2G1, B2GP1, BG)
P19957 (ELAF_HUMAN)	Trappin-2,anti-inflammatory serine protease inhibitor/Elafin, Peptidase inhibitor 3	PI3 WAP3, WFDC14
P01584.2 (IL1B_HUMAN)	cytokine IL-1β	IL1B IL1F2
P05109 (S10A8_HUMAN	S100A8 , S100 calcium binding protein A8	S100A8 CAGA, CFAG, MRP8)
P06702 (S10A9_HUMAN)	S100A9, S100 calcium binding protein A9	S100A9 CAGB, CFAG, MRP14
P04083 (ANXA1_HUMAN)	Annexin-1	ANXA1 ANX1, LPC1
P14210 (HGF_HUMAN)	HGF, Hepatocyte growth factor	HGF, HGF HPTA
P01303 (NPY_HUMAN)	NPY, Pro-neuropeptide Y	NPY
P01282 (VIP_HUMAN)	VIP, Vasoactive Intestinal Peptide	Vasoactive Intestinal Peptide (VIP),
P00751 (CFAB_HUMAN)	Complement protein CFB	AHUS4, ARMD14, BF, BFD, CFAB, CFBD, FB, FBI12, GBG, H2-Bf, PBF2.
P01024 (CO3_HUMAN)	Complement protein C3	AHUS5, ARMD9, ASP, C3a, C3b, CPAMD1, HEL-S-62p
P0C0L5 (CO4B_HUMAN)	C4B, C4B CO4, CPAMD3 C4B_2	C4B – complement C4B
P01009 (A1AT_HUMAN)	Alpha-1-antitrypsin protein SERPINA1	SERPINA1, A1A, A1AT, AAT, PI, PI1, PRO2275, alpha1AT, nNIF, SERPINA1 AAT, PI, PRO0684, PRO2209
P02750 (A2GL_HUMAN)	LRG, Leucine-rich alpha-2-glycoprotein	LRG1, LRG
P03973 (SLPI_HUMAN)	SLPI, Secretory leukocyte protease inhibitor, Antileukoproteinase	SLPI WAP4, WFDC4
P08195 (4F2_HUMAN)	SLC3A2,solute carrier family 3 member 2, 4F2 cell-surface antigen heavy chain	SLC3A2 MDU1
P29034 (S10A2_HUMAN)	Protein S100-A2, S100A2, CAN19, Protein S-100LS100 calcium-binding protein A2	S100A2 S100L
P18510 (IL1RA_HUMAN)	IL1RN, IL1RN – interleukin 1 receptor antagonist	DIRA, ICIL-1RA, IL-1RN, IL-1ra, IL-1ra3, IL1F3, IL1RA, IRAP, MVCD4
P10145 (IL8_HUMAN)	Interleukin-8, IL8	CXCL8 IL8
P01584 IL1B_HUMAN)	IL1beta	IL1B IL1F2
Q9HD89 (RETN_HUMAN)	resistin	RETN FIZZ3, HXCP1, RSTN, UNQ407/PRO1199
P01009 (A1AT_HUMAN)	SERPINA1, serpin family A member 1, Alpha-1-antitrypsin	A1A, A1AT, AAT, PI, PI1, PRO2275, alpha1AT, nNIF, SERPINA1 AAT, PI, PRO0684, PRO2209
Q03591 (FHR1_HUMAN)	complement factor H (CFH)	CFH, CFHR1 CFHL, CFHL1, CFHL1P, CFHR1P, FHR1, HFL1, HFL2
P02671 (FIBA_HUMAN)	fibrinogen alpha chain (FGA)	Fib2
P14543 (NID1_HUMAN)	nidogen-1 (NID1)	NID1 NID
P50454 (SERPH_HUMAN)	serpin family H member 1	AsTP3, CBP1, CBP2, HSP47, OI10, PIG14, PPROM, RA-A47, SERPINH2, gp46
P41252 (SYIC_HUMAN)	IARS, isoleucyl-tRNA synthetase 1	GRIDHH, IARS, ILERS, ILRS, IRS, PRO0785
Q15046 (SYK_HUMAN)	KARS,Lysine--tRNA ligase	CMTRIB, DFNB89, KARS, KARS2, KRS
Q9UGM6 (SYWM_HUMAN)	Tryptophan--tRNA ligase, cytoplasmic	WARS IFI53, WRS
P04080 (CYTB_HUMAN)	cystatin B	CSTB CST6, STFB
P60174, (TPIS_HUMAN)	TPI1, triosephosphate isomerase	HEL-S-49, TIM, TPI, TPID
Q9UGM3, (DMBT1_HUMAN)	DMBT1, deleted in malignant brain tumors 1	GP340, SAG, SALSA, muclin
P01023, (A2MG_HUMAN)	α2-macroglobulin	A2M CPAMD5, FWP007
P00450, (CERU_HUMAN)	ceruloplasmin	CP
P02788, (TRFL_HUMAN)	lactotransferrin	GIG12, HEL110, HLF2, LF
P22079, (PERL_HUMAN)	lactoperoxidase	SPO, LPO, LPO SAPX
P18510 (IL1RA_HUMAN)	IL1RN, IL1RN – interleukin 1 receptor antagonist	DIRA, ICIL-1RA, IL-1RN, IL-1ra, IL-1ra3, IL1F3, IL1RA, IRAP, MVCD4
Q9HC84, (MUC5B_HUMAN)	MUC5B, mucin 5B, oligomeric mucus/gel-forming	MG1, MUC-5B, MUC5, MUC9
Q8TAX7, (MUC7_HUMAN)	MUC7	MG2
P01036, (CYTS_HUMAN), P01037, (CYTN_HUMAN), P09228, (CYTT_HUMAN)	S-type cystatins, Cystatin-SN, Cystatin-S, Cystatin-SA	CST4, CST1, CST2
P02763 (A1AG1_HUMAN)	Alpha-1-acid glycoprotein	ORM1 AGP1 1
P00738, (HPT_HUMAN)	haptoglobin	BP, HP2ALPHA2, HPA1S
P02787, (TRFE_HUMAN)	serotransferrin	HEL-S-71p, PRO1557, PRO2086, TFQTL1, TF PRO1400
P02790, (HEMO_HUMAN)	hemopexin	HPX
P04406, (G3P_HUMAN)	GADPH	GAPDH GAPD, CDABP0047, OK/SW-cl.12
P02766, (TTHY_HUMAN)	transthyretin	ATTR, CTS, CTS1, HEL111, HsT2651, PALB, TBPA, TTR
P01034, CYTC_HUMAN	cystatin C	CST3, ARMD11, HEL-S-2,
P06733, (ENOA_HUMAN)	alpha-enolase	ENO1 ENO1L1, MBPB1, MPB1
P80511, (S10AC_HUMAN)	S100A12	S100A12
P02808, (STAT_HUMAN)	statherin	STATH
P02810, (PRAP1_HUMAN)	acidic proline-rich proteins	PRAP1 UPA, UNQ608/PRO1195
P15515, (HIS1_HUMAN)	histatin 1	HTN1 HIS1
P01834, (IGKC_HUMAN)	Ig kappa chain C region/Immunoglobulin kappa constant	IGKC
P01857 (IGHG1_HUMAN)	Ig gamma-1 chain C region/Immunoglobulin heavy constant gamma 1	IGHG1
P0DOY2 (IGLC2_HUMAN)	Ig lambda-2 chain C/Immunoglobulin lambda constant 2	IGLC2
P08246 (ELNE_HUMAN)	neutrophil elastase	ELANE ELA2 GE, HLE, HNE, NE, PMN-E, SCN1
P01833,(PIGR_HUMAN)	polymeric immunoglobulin receptor,PIGR – polymeric immunoglobulin receptor	PIGR
